# Supplementary material for: Infant Feeding Websites and Apps: A Systematic Assessment of Quality and Content
Source: PubMed Central journal article supplement (PMC4704960; doi:10.2196/ijmr.4323), 2015-09-29
Supplement: ijmr_v4i3e18_app5.pdf [file ijmr_v4i3e18_app5.pdf]

| <b>App number</b> | <b>App name</b>                                      | <b>App version</b> | <b>Last update</b> |
|-------------------|------------------------------------------------------|--------------------|--------------------|
| 1                 | Baby – Sprout                                        | 2.02 (trial)       | 2014               |
| 2                 | Baby Care Master +                                   | 3.5 (full)         | 2014               |
| 3                 | Baby Food Recipe                                     | 1.2 (full)         | 2014               |
| 4                 | Baby Weaning Recipes, Planners and Guides            | 1.3.1 (full)       | 2014               |
| 5                 | Babyroo - Baby Log for Breastfeeding                 | 1.3.2 (trial)      | 2014               |
| 6                 | Child Feeding Guide                                  | 1.3.3 (full)       | 2013               |
| 7                 | Feed Safe (from Australia Breastfeeding Association) | 1.0.4 (full)       | 2014               |
| 8                 | My Baby & Me by Phillips AVENT                       | 4.6 (full)         | 2014               |
| 9                 | My Baby Today - BabyCenter                           | 2.2.1 (full)       | 2014               |
| 10                | Sara Chana's Breastfeeding...                        | 1.1 (full)         | 2014               |
| 11                | Super Baby Food                                      | 1.03 (full)        | 2011               |
| 12                | Tess Daly - The Baby Diaries                         | 1.0.2 (full)       | 2011               |
| 13                | The Weaning of Life - by Plum!                       | 1.0.2 (full)       | 2012               |
| 14                | Today's Parent Milestones                            | 1.3.2 (full)       | 2014               |
| 15                | WebMD Baby                                           | 2.0 (full)         | 2014               |
| 16                | What's Up Baby Feeding                               | 1.0 (full)         | 2013               |
| 17                | What to Expect                                       | 6.3.1 (full)       | 2014               |
| 18                | baby care and baby care                              | 2.3.1 (full)       | 2014               |
| 19                | breast feeding                                       | 1.4.7 (full)       | 2014               |
| 20                | breast feeding (Makeshift labs)                      | 6.0 (full)         | 2014               |
| 21                | breast feeding tips and more                         | 1.5 (full)         | 2014               |
| 22                | baby feeding                                         | 6.73 (full)        | 2014               |
| 23                | the breastfeeding guide                              | 1.0.2 (full)       | 2014               |
| 24                | infant meal guide                                    | 1.1 (full)         | 2014               |
| 25                | breastmilk counts                                    | 1.1 (full)         | 2011               |
| 26                | baby weaning guide                                   | 1.0 (full)         | 2014               |
| 27                | The breast app ever                                  | 1.0 (full)         | 2014               |
| 28                | essential baby care guide                            | 1.5 (full)         | 2013               |
| 29                | breastfeeding info                                   | 1.0 (full)         | 2011               |
| 30                | breastfeeding tips and problems                      | 1.0 (full)         | 2013               |
| 31                | 247 baby                                             | 1.0 (full)         | 2011               |
| 32                | Baby                                                 | 1.5 (full)         | 2014               |
| 33                | homemade baby food                                   | 5 (full)           | 2013               |
| 34                | 100+ baby food recipe                                | 1.2 (trial)        | 2013               |
| 35                | baby food recipes                                    | 8.412 (full)       | 2014               |
| 36                | baby food and baby food                              | 1.0 (full)         | 2013               |
| 37                | savvy breastfeed guide                               | 1.0 (trial)        | 2014               |
| 38                | breast start                                         | 1.4 (full)         | 2014               |
| 39                | breastfeeding tips                                   | 1.5 (full)         | 2014               |
| 40                | guide to breastfeeding                               | 1.0 (full)         | 2014               |
| 41                | breast is best                                       | 1.0 (full)         | 2012               |
| 42                | baby weaning tips                                    | 1.8 (full)         | 2012               |
| 43                | guide for new parents                                | 1.0 (full)         | 2012               |

|    |                   |            |      |
|----|-------------------|------------|------|
| 44 | baby food         | 1.0 (full) | 2013 |
| 45 | baby diet         | 1.0 (full) | 2012 |
| 46 | weaning your baby | 1.0 (full) | 2013 |
